# Supplementary material for: Luteolin Isolated from Polygonum cuspidatum Is a Potential Compound against Nasopharyngeal Carcinoma
Source: Biomed Res Int. 2022 Dec 23;2022:9740066. doi: 10.1155/2022/9740066 (PMC9803567; doi:10.1155/2022/9740066)
Supplement: Supplementary Materials — Table S1: Basic information of the bioactive compounds of P. cuspidatum. Table S2: The targets for the bioactive compounds of P. cuspidatum in the TCMSP database. Table S3: The standard names of targets for the bioactive compounds of P. cuspidatum. Table S4: Basic information of the disease related targets for NPC. Table S5: The common targets of disease targets for NPC and bioactive compounds from P. cuspidatum. Table S6: GO analysis of common targets of drug compounds and diseases through the DAVID website. Table S7: KEGG pathway analysis of common targets of drug compounds and diseases through the DAVID website. Figure S1: Effect of different bioactive compounds on the survival rate of CNE2 cells in NPC. [file 9740066.f1.zip]

Archive with 8 entries (8 files):
- Figure 1S  Effect of different bioactive compounds on the survival rate of CNE2 cells in NPC. .png
- Table 1S Basic information of the bioactive compounds of P. cuspidatum.docx
- Table 2S The targets for the bioactive compounds of P. cuspidatum in the TCMSP database.docx
- Table 3S The standard names of targets for the bioactive compounds of P. cuspidatum.docx
- Table 4S Basic information of the disease related targets for NPC.docx
- Table 5S The common targets of disease targets for NPC and bioactive compounds from P. cuspidatum.docx
- Table 6S GO analysis of common targets of drug compounds and diseases through the DAVID website.docx
- Table 7S KEGG pathway analysis of common targets of drug compounds and diseases through the DAVID website.docx
